# Supplementary material
Source: PubMed Central journal article supplement (PMC10840946)
Supplement: NIHMS1920836-supplement-Supinfo.pdf [file NIHMS1920836-supplement-Supinfo.pdf]

## Supplementary Appendix - Variation in Care for Patients Presenting with Hip Fracture in 6 High-Income Countries: A Cross-Sectional Cohort Study

### Contents

|                                                                                                                                                                                          |    |
|------------------------------------------------------------------------------------------------------------------------------------------------------------------------------------------|----|
| Supplementary S1: Description of data sources and research ethics approval from each country/jurisdiction. ....                                                                          | 2  |
| United States .....                                                                                                                                                                      | 2  |
| Ontario (Canada).....                                                                                                                                                                    | 3  |
| Manitoba (Canada).....                                                                                                                                                                   | 4  |
| England .....                                                                                                                                                                            | 5  |
| Netherlands .....                                                                                                                                                                        | 6  |
| Israel.....                                                                                                                                                                              | 7  |
| Taiwan:.....                                                                                                                                                                             | 8  |
| Supplementary S2: List of codes used by each country to identify hip fractures, Total hip arthroplasty (THA), Hemiarthroplasty, and Internal Fixation (IF).....                          | 9  |
| Supplementary S3: Cohorts generation steps .....                                                                                                                                         | 14 |
| Supplementary S4: Number of hip fracture hospitalizations by country and year .....                                                                                                      | 14 |
| Supplementary S5: Age- and sex-standardized incidence of hospital admissions for hip fracture by country and year, admissions per 1000 per year <sup>1</sup> .....                       | 15 |
| Supplementary S6: Age and sex standardized mortality and readmissions after hospitalization for hip fracture by country, 2011-2018 .....                                                 | 16 |
| Supplementary S7: Age and sex standardized percentages of patients receiving THA, HA, and IF* for patients hospitalized with hip fracture, 2011-2018.....                                | 17 |
| Supplementary S8: Age and sex standardized percentages of patients receiving THA, HA, and IF* for patients hospitalized with hip fracture for all years, by country.....                 | 18 |
| Supplementary S9: Stratified Age and sex standardized percentages of patients receiving THA, HA, and IF* for patients hospitalized with hip fracture, 2011-2018 .....                    | 20 |
| Supplementary S10: Stratified Age and sex standardized mortality for hip fracture by country, 2011-2018 .....                                                                            | 21 |
| Supplementary S11: Age and sex standardized percentages of patients receiving THA, HA, and IF for patients hospitalized with hip fracture, 2011-2018 (Netherlands before upscaling)..... | 22 |

**Supplementary S1: Description of data sources and research ethics approval from each country/jurisdiction.**

**United States**

All hospitalizations for hip fracture in adults aged  $\geq 66$  years at the time of hospitalization during calendar years 2011-2018 were identified using 100% Medicare fee-for-service (FFS) data. Data from 2010 was used as a “look-back” and data from 2019 were used to ascertain post-hip fracture outcomes.

During our study period, approximately 75% (2011) and 67% (2018) of the US Medicare population were enrolled in FFS Medicare and thus included in our study population, with the remainder enrolled in Medicare managed care plans.

| <b>Hip Fracture Identification and Outcomes</b>                                                                              |                                                                                                                                                                                  |
|------------------------------------------------------------------------------------------------------------------------------|----------------------------------------------------------------------------------------------------------------------------------------------------------------------------------|
| <u>Data sources*</u>                                                                                                         | <u>Use</u>                                                                                                                                                                       |
| 100% Medicare Part A Data (2010-2018)                                                                                        | a. Identification of patients hospitalized with a primary diagnosis of hip fracture<br>b. Creation of comorbidities<br>c. In-hospital and post-hospital utilization and outcomes |
| 100% Medicare Beneficiary Summary File                                                                                       | a. Date of death                                                                                                                                                                 |
| <b>Population Count and Demographics</b><br>(Used for Calculation of hip fracture Hospitalization Rates and Standardization) |                                                                                                                                                                                  |
| Medicare Beneficiary Summary File                                                                                            | Number of Medicare FFS enrollees by year<br>Age/race/sex/ethnicity/area of residence information                                                                                 |

Analyses were conducted at Harvard Medical School. This study was approved by the Institutional Review Board (IRB) of the Harvard Faculty of Medicine.

---

\* For more information on US Medicare Part A Data please visit: <https://www.cms.gov/Research-Statistics-Data-and-Systems/Statistics-Trends-and-Reports/MedicareFeeforSvcPartsAB/MEDPAR>

**Ontario (Canada)**

All hospitalizations for hip fracture in adults aged  $\geq 66$  years at the time of hospitalization during calendar years 2011-2018 were identified using 100% Ontario Discharge Abstract Database (DAD). Data from 2010 was used as a “look-back” and data from 2019 were used to ascertain post-hip fracture outcomes.

The DAD includes all admissions to all acute care hospitals in the province of Ontario and thus is inclusive of the entire Ontario population.

Analyses were conducted at ICES, which is approved for storing and analyzing data from the Ontario provincial insurance program (Ontario Health Insurance Plan), which covers all health care for all residents of the province.

| <b>Hip Fracture Identification and Outcomes</b>                                         |                                                                                                                                                  |
|-----------------------------------------------------------------------------------------|--------------------------------------------------------------------------------------------------------------------------------------------------|
| <u>Data source*</u>                                                                     | <u>Use</u>                                                                                                                                       |
| Ontario Discharge Abstract Database (2010-2018)                                         | a. Identification of patients hospitalized with a primary diagnosis of a hip fracture<br>b. Creation of comorbidities<br>c. In-hospital outcomes |
| OHIP Billing Data (2011-2018)                                                           | a. Post-hip fracture treatments and procedures                                                                                                   |
| Registered Persons Data Base files                                                      | a. Determination of death date, birth date, and insurance coverage start and end date                                                            |
| <b>Population Count and Demographics</b>                                                |                                                                                                                                                  |
| <u>(Used for Calculation of hip fracture Hospitalization Rates and Standardization)</u> |                                                                                                                                                  |
| Registered Persons Data Base files                                                      | Age/sex/ethnicity/area of residence information                                                                                                  |

The use of the data in this project is authorized under section 45 of Ontario’s Personal Health Information Protection Act (PHIPA) and does not require review by a Research Ethics Board.

\* For more information on Ontario Discharge Abstract Data please visit <https://data.ontario.ca/dataset/discharge-abstract-database-dad-ontario-hospitals>

### Manitoba (Canada)

All hospitalizations for hip fractures in adults aged  $\geq 66$  years at the time of hospitalization during calendar years 2011-2018 were identified using 100% Manitoba Discharge Abstract Database (DAD). Data from 2010 was used as a “look-back” and data from 2019 were used to ascertain post-hip fracture outcomes.

The Manitoba DAD includes all admissions to all acute care hospitals in the province of Manitoba and thus is inclusive of the entire Manitoba population eligible to receive health services.

Analyses were conducted using the Population Research Data Repository housed at the Manitoba Centre for Health Policy at the University of Manitoba and utilized the administrative data from the Manitoba Ministry of Health (I.e., Manitoba Health and Seniors Care). The administrative data captures all publicly-insured health services for all residents of the province who are eligible to receive health services.

| <b>Hip Fracture Identification and Outcomes</b>                                                                              |                                                                                                                                                  |
|------------------------------------------------------------------------------------------------------------------------------|--------------------------------------------------------------------------------------------------------------------------------------------------|
| <u>Data source*</u>                                                                                                          | <u>Use</u>                                                                                                                                       |
| Manitoba Discharge Abstract Database (2010-2018)                                                                             | a. Identification of patients hospitalized with a primary diagnosis of a hip fracture<br>b. Creation of comorbidities<br>c. In-hospital outcomes |
| Physician Billing Data (2011-2018)                                                                                           | a. Post-hip fracture treatments and procedures                                                                                                   |
| Manitoba Health Insurance Registry                                                                                           | Determination of death date, birth date, and insurance coverage start and end dates.                                                             |
| <b>Population Count and Demographics</b><br>(Used for Calculation of hip fracture Hospitalization Rates and Standardization) |                                                                                                                                                  |
| Manitoba Health Population Database                                                                                          | Counts of the population by sex, age group, and year                                                                                             |

The authors acknowledge the Manitoba Centre for Health Policy for the use of data contained in the Manitoba Population Health Research Data Repository (Health Information Privacy Committee project # 2019/2020-38). The results and conclusions are those of the authors, and no official endorsement by the Manitoba Centre for Health Policy, Manitoba Health, and Seniors Care, or other data providers is intended or should be inferred.

---

\* For more information on Manitoba data please visit: <https://umanitoba.ca/manitoba-centre-for-health-policy/data-repository>

England

All hospitalizations for hip fracture in adults aged  $\geq 66$  years at the time of hospitalization during calendar years 2011-2018 were identified using the Clinical Practice Research Datalink. Data from 2010 was used as a “look-back” and data from 2019 were used to ascertain post-hip fracture outcomes. CPRD has been shown to be representative of the English population by age, sex, and ethnicity and has been validated for research.<sup>1-3</sup> Analyses were conducted at the Institute of Health Informatics, University College London using linked electronic health records from primary care (CPRD), hospitalization (HES), and the national death registry (ONS).<sup>2</sup>

| <b>Hip Fracture Identification and Outcomes</b>                                                                                                   |                                                                                                                                                                           |
|---------------------------------------------------------------------------------------------------------------------------------------------------|---------------------------------------------------------------------------------------------------------------------------------------------------------------------------|
| <u>Data source</u>                                                                                                                                | <u>Use</u>                                                                                                                                                                |
| Clinical Practice Research Datalink (GOLD and Aurum)                                                                                              | a. Patient identification<br>b. Demographics<br>c. Creation of comorbidities                                                                                              |
| Hospital Episode Statistics (HES)                                                                                                                 | a. Identification of patients hospitalized with a primary diagnosis of hip fracture<br>b. Creation of comorbidities<br>c. In-hospital outcomes<br>d. Inpatient procedures |
| Office of National Statistics                                                                                                                     | Cause-specific mortality                                                                                                                                                  |
| <b><u>Population Count and Demographics</u></b><br><b><u>(Used for Calculation of hip fracture Hospitalization Rates and Standardization)</u></b> |                                                                                                                                                                           |
|                                                                                                                                                   | Counts of population by sex, age group, and year                                                                                                                          |

The study was approved by the MHRA (UK) Independent Scientific Advisory Committee 20\_021, under Section 251 (NHS Social Care Act 2006). This study is based in part on data from the Clinical Practice Research Datalink obtained under licence from the UK Medicines and Healthcare Products Regulatory Agency. The data is provided by patients and collected by the NHS as part of their care and support. The interpretation and conclusions contained in this study are those of the author/s alone. HES and ONS data copyright 2022, re-used with the permission of The Health & Social Care Information Centre. All rights reserved.

## Netherlands

All hospitalizations for hip fracture in Dutch adults aged  $\geq 66$  years at the time of hospitalization during calendar years 2013-2018 were identified using data from the national register for hospital care.<sup>4</sup> Data from 2012 was used as a “look-back” and data from 2019 were used to ascertain post-hip fracture outcomes.

These data include all inpatient hospitalizations in the Netherlands. Primary and secondary diagnoses are recorded, as well as the main procedure performed during the admission. Demographic information and, if applicable, the date of death were extracted from municipality registers\*.

Due to a certain number of patients each year lacking registration of their operations, we took the precaution of upscaling the surgery performed for the remaining patients to reach 100%. This was done to prevent any unjustified exclusions. To ensure that this approach did not introduce any bias, we conducted a sensitivity analysis. The results showed that the patients with missing registrations were equally distributed across geographical regions and hospitals. Supplementary S11 provides an example of the original register of procedures.

| <b>Hip Fracture Identification and Outcomes</b>                                                                                                     |                                                                                                                                                                                                           |
|-----------------------------------------------------------------------------------------------------------------------------------------------------|-----------------------------------------------------------------------------------------------------------------------------------------------------------------------------------------------------------|
| <u>Data sources</u> <sup>†</sup>                                                                                                                    | <u>Use</u>                                                                                                                                                                                                |
| National Register for hospital care, Landelijke Basisregistratie Ziekenhuiszorg (LBZ – 2013-2018), and Landelijke Medische Registratie (LMR – 2012) | a. Identification of patients hospitalized with a primary diagnosis of a hip fracture<br>b. Creation of comorbidities<br>c. In-hospital and post-hospital procedure utilization <sup>‡</sup> and outcomes |
| Municipality Register (GBAPERSOONTAB, GBAOVERLIJDENTAB)                                                                                             | Determination of age and sex, date of death                                                                                                                                                               |
| <b>Population Count and Demographics</b><br>(Used for Calculation of hip fracture Hospitalization Rates and Standardization)                        |                                                                                                                                                                                                           |
| Municipality Register (GBA)                                                                                                                         | Counts of population by sex, age group, and year                                                                                                                                                          |

This study was approved by the Internal Review Board (IRB) of the Erasmus School of Health Policy and Management on October 5, 2019.

\* An example of another paper using the same data is García-Gómez, P., van Kippersluis, H., O'Donnell, O., & van Doorslaer, E. (2013). Long Term and Spillover Effects of Health Shocks on Employment and Income. *The Journal of human resources*, 48(4), 873–909. <https://doi.org/10.1353/jhr.2013.0031>

<sup>†</sup> [Statistics Netherlands \(2022\)](https://www.cbr.nl) provides detailed information on the variables and observations in these data sources, their representativity, and the procedure to get data access.

<sup>‡</sup> The procedures were classified using the CBV, CVV and ZA classifications. Procedure codes occurring in the cohort were translated with the “verrichtingthesaurus” (<https://trex.dhd.nl/>). Based on the translation these three classifications were assigned. Similar approach was followed by Rabbe et al. (in press).

## Israel

Analyses were conducted at the Clinical Research Center (CRC) in Soroka University Medical Center and included national data of Clalit Health Services insured patients.

All hospitalizations for hip fracture in adults aged  $\geq 66$  years at the time of hospitalization during calendar years 2011-2018 were identified using Clalit Health Services (CHS) Data sharing platform powered by MDClone© (<https://www.mdclone.com>). Data from 2010 was used as a “look-back” and data from 2019 were used to ascertain post-hip fracture outcomes. The data is broadly representative of the Israel population concerning age, sex, and geography. Clalit Health Services is Israel’s largest insurance company and healthcare provider, providing most of Israel’s healthcare services and health insurance to 54% of the country’s population. Services include primary, secondary, and tertiary care (including a third of Israel’s acute care beds), pharmacies, and paramedical services. CHS maintains a comprehensive database, continuously updated with information about a subject’s demographics, community and outpatient visits, laboratory tests, hospitalizations, medication prescriptions, and purchases.

| <b>Hip Fracture Identification and Outcomes</b>                                                                 |                                                                                                                                                                                      |
|-----------------------------------------------------------------------------------------------------------------|--------------------------------------------------------------------------------------------------------------------------------------------------------------------------------------|
| <u>Data sources*</u>                                                                                            | <u>Use</u>                                                                                                                                                                           |
| CHS Data warehouse using accessed by MDClone©                                                                   | a. Identification of patients hospitalized with a primary diagnosis of a hip fracture<br>b. Demographic information (Age, sex, SES)<br>c. Creation of comorbidities                  |
| CHS Data warehouse using accessed by MDClone©                                                                   | d. Procedures related to the diagnosis of hip fracture<br>e. In-hospital and post-hospital utilization and outcomes                                                                  |
| <b><u>Population Count and Demographics</u></b><br>(Used for Calculation of hip fracture Hospitalization Rates) |                                                                                                                                                                                      |
| CHS Data warehouse using accessed by MDClone©                                                                   | The population denominator includes all Clalit members that were $\geq 66$ years in each year from 2011 through 2018 and were members of Clalit one year before and after that year. |

This study was conducted according to the guidelines of the Declaration of Helsinki and was approved by the Institutional Review Board of Soroka University Medical Center (Ref. 0467-18)

---

\* For more information on the Israel data from Clalit please see: <http://clalitresearch.org/about-us/our-data/>

## Taiwan:

All hospitalizations for hip fracture in adults aged  $\geq 66$  years at the time of hospitalization during calendar years 2011-2018 were identified using Taiwan's Inpatient Expenditures data. Data from 2010 was used as a "look-back" and data from 2019 were used to ascertain post-hip fracture outcomes.

Key data files included the National Health Insurance (NHI) Inpatient Expenditures by Admission file, which contains all admissions to all acute care hospitals in Taiwan and thus is inclusive of Taiwan population. The NHI Registry for Beneficiaries file includes demographic and socioeconomic status information of all NHI beneficiaries. Because all legal residents in Taiwan are eligible to enroll in the NHI program and the enrollment rate has exceeded 99% since 2000, these data are population representative. The Cause of Death Data provides information on the cause and date of all reported deaths in Taiwan. Analyses were conducted at the Yang-Ming branch of the Health and Welfare Data Science Center, Taiwan Ministry of Health and Welfare. The primary data sources were the National Health Insurance Research Database and Cause of Death Data.<sup>5</sup>

| <b>Hip Fracture Identification and Outcomes</b>                                         |                                                                                                                                                                                                 |
|-----------------------------------------------------------------------------------------|-------------------------------------------------------------------------------------------------------------------------------------------------------------------------------------------------|
| <u>Data sources*</u>                                                                    | <u>Use</u>                                                                                                                                                                                      |
| Inpatient Expenditures by Admissions (2010-2018)                                        | a. Identification of patients hospitalized with a primary diagnosis of a hip fracture <sup>6</sup><br>b. Creation of comorbidities<br>c. In-hospital and post-hospital utilization and outcomes |
| Cause of Death Data                                                                     | Determination of death date                                                                                                                                                                     |
| <b>Population Count and Demographics</b>                                                |                                                                                                                                                                                                 |
| <u>(Used for Calculation of hip fracture Hospitalization Rates and Standardization)</u> |                                                                                                                                                                                                 |
| Registry for Beneficiaries                                                              | a. Counts of the population by sex, age group, and year<br>b. Determination of birth date and sex                                                                                               |

This study was approved by the Institutional Review Board of National Yang Ming Chiao Tung University (IRB number: YM110134E).

## References

1. Herrett E, Shah AD, Boggon R, et al. Completeness and diagnostic validity of recording acute myocardial infarction events in primary care, hospital care, disease registry, and national mortality records: cohort study. *Bmj* 2013;346:f2350. doi: 10.1136/bmj.f2350 [published Online First: 2013/05/23]
2. Herrett E, Gallagher AM, Bhaskaran K, et al. Data Resource Profile: Clinical Practice Research Datalink (CPRD). *Int J Epidemiol* 2015;44(3):827-36. doi: 10.1093/ije/dyv098 [published Online First: 2015/06/08]
3. Herrett E, Gallagher AM, Bhaskaran K, et al. Data Resource Profile: Clinical Practice Research Datalink (CPRD). *International Journal of Epidemiology* 2015;44(3):827-36. doi: 10.1093/ije/dyv098
4. World Health Organization. Regional Office for E, European Observatory on Health S, Policies, et al. Netherlands: health system review. Copenhagen: World Health Organization. Regional Office for Europe 2016:240 p.
5. Hsieh CY, Su CC, Shao SC, et al. Taiwan's National Health Insurance Research Database: past and future. *Clin Epidemiol* 2019;11:349-58. doi: 10.2147/celep.S196293 [published Online First: 2019/05/24]
6. Saw SM, Hong CY, Lee J, et al. Awareness and health beliefs of women towards osteoporosis. *Osteoporos Int* 2003;14(7):595-601.

\* For more information on US Medicare Part A DataTaiwan's NHI Data and Cause of Death Data please visit: <https://dep.mohw.gov.tw/dos/cp-5119-59201-113.html> (in Chinese)



**Supplementary S2: List of codes used by each country to identify hip fractures, Total hip arthroplasty (THA), Hemiarthroplasty, and Internal Fixation**

**(IF).**<sup>\*</sup>

ICD = International Classification of Diseases, CCI = Canadian Classification of Interventions.

|                                             | United States                                                                                                                                                                                                  | Canada                                   | England                                                                                                                                                                   | Netherlands                                                                                                                                                                                     | Israel                                                                             | Taiwan                                                                                                                                                                                                         |
|---------------------------------------------|----------------------------------------------------------------------------------------------------------------------------------------------------------------------------------------------------------------|------------------------------------------|---------------------------------------------------------------------------------------------------------------------------------------------------------------------------|-------------------------------------------------------------------------------------------------------------------------------------------------------------------------------------------------|------------------------------------------------------------------------------------|----------------------------------------------------------------------------------------------------------------------------------------------------------------------------------------------------------------|
| <b>Hip fracture diagnosis in admission</b>  | ICD-9:<br>820.0x<br>820.20<br>820.21<br>820.1<br>820.22<br>820.3<br>820.8<br>820.9<br><br>Icd-10:<br>S72.0x<br>S72.1x<br>S72.2x                                                                                | ICD-10-CA:<br>S72.0x<br>S72.1x<br>S72.2x | ICD-10:<br>S72.0x<br>S72.1x<br>S72.2x                                                                                                                                     | ICD-10:<br>S72.0x<br>S72.1x<br>S72.2x                                                                                                                                                           | ICD-9:<br>820.0x<br>820.20<br>820.21<br>820.1<br>820.22<br>820.3<br>820.8<br>820.9 | ICD-9:<br>820.0x<br>820.20<br>820.21<br>820.1<br>820.22<br>820.3<br>820.8<br>820.9<br><br>Icd-10:<br>S72.0x<br>S72.1x<br>S72.2x                                                                                |
| <u>Codes for THA, HA, and IF by country</u> |                                                                                                                                                                                                                |                                          |                                                                                                                                                                           |                                                                                                                                                                                                 |                                                                                    |                                                                                                                                                                                                                |
| <b>THA</b>                                  | ICD-9:<br>81.51<br><br>ICD-10:<br>0SRB019<br>0SRB0J9<br>0SRB0JA<br>0SRB0JZ<br>0SRB01A<br>0SRB01Z<br>0SRB029<br>0SRB02A<br>0SRB02Z<br>0SRB039<br>0SRB03A<br>0SRB03Z<br>0SRB049<br>0SRB04A<br>0SRB04Z<br>0SRB069 | CCI:<br>1.VA.53.LA.PN                    | OPCS-4:<br>W37.1<br>W37.8<br>W37.9<br>W38.1<br>W38.8<br>W38.9<br>W39.1<br>W39.8<br>W39.9<br>W93.1<br>W93.8<br>W93.9<br>W94.1<br>W94.8<br>W94.9<br>W95.1<br>W95.8<br>W95.9 | ZA codes:<br>038567<br>190305<br>038569<br>038568<br><br>CVV codes:<br>58150<br>581652<br>581520<br><br>CBV codes:<br>338568K<br>338568J<br>338568A<br>338567K<br>338568B<br>338567J<br>338568L | 81.51                                                                              | ICD-9:<br>81.51<br><br>ICD-10:<br>0SRB019<br>0SRB0J9<br>0SRB0JA<br>0SRB0JZ<br>0SRB01A<br>0SRB01Z<br>0SRB029<br>0SRB02A<br>0SRB02Z<br>0SRB039<br>0SRB03A<br>0SRB03Z<br>0SRB049<br>0SRB04A<br>0SRB04Z<br>0SRB069 |

\* Within a general framework similar to the US, countries were allowed to adapt coding schemes to fit local context and practice.

|           |                                                                                                                                                                                                                                                                                                                                                                              |                                         |                                                                                          |                                                                                                                                          |       |                                                                                                                                                                                                                                                                                                                                                                              |
|-----------|------------------------------------------------------------------------------------------------------------------------------------------------------------------------------------------------------------------------------------------------------------------------------------------------------------------------------------------------------------------------------|-----------------------------------------|------------------------------------------------------------------------------------------|------------------------------------------------------------------------------------------------------------------------------------------|-------|------------------------------------------------------------------------------------------------------------------------------------------------------------------------------------------------------------------------------------------------------------------------------------------------------------------------------------------------------------------------------|
|           | OSRB06A<br>OSRB06Z<br>OSRB07Z<br>OSRB0EZ<br>OSRB0J9<br>OSRB0JA<br>OSRB0JZ<br>OSRB0KZ<br><br>Right= 9<br>OSR90JA<br>OSR90JZ<br>OSR9019<br>OSR901A<br>OSR901Z<br>OSR902A<br>OSR902Z<br>OSR9039<br>OSR903A<br>OSR903Z<br>OSR9049<br>OSR904A<br>OSR904Z<br>OSR9069<br>OSR906A<br>OSR906Z<br>OSR907Z<br>OSR90EZ<br>OSR90J9<br>OSR90JA<br>OSR90JZ<br>OSR90KZ<br>OSR9019<br>OSR9029 |                                         |                                                                                          | 338568P<br>338569K<br>338568W<br>338569D<br>338568U<br>338567A<br>338568Z<br>338569                                                      |       | OSRB06A<br>OSRB06Z<br>OSRB07Z<br>OSRB0EZ<br>OSRB0J9<br>OSRB0JA<br>OSRB0JZ<br>OSRB0KZ<br><br>Right= 9<br>OSR90JA<br>OSR90JZ<br>OSR9019<br>OSR901A<br>OSR901Z<br>OSR902A<br>OSR902Z<br>OSR9039<br>OSR903A<br>OSR903Z<br>OSR9049<br>OSR904A<br>OSR904Z<br>OSR9069<br>OSR906A<br>OSR906Z<br>OSR907Z<br>OSR90EZ<br>OSR90J9<br>OSR90JA<br>OSR90JZ<br>OSR90KZ<br>OSR9019<br>OSR9029 |
| <b>HA</b> | Icd-9:<br>81.52<br>Icd-10:<br>OSR.A009<br>OSR.A00A<br>OSR.A00Z<br>OSR.A019<br>OSR.A01A<br>OSR.A01Z<br>OSR.A039<br>OSR.A03A<br>OSR.A03Z<br>OSR.A07Z<br>OSR.A0J9                                                                                                                                                                                                               | CCI:<br>1.VA.53.LA.PM,<br>1.SQ.53.LA.PM | OPCS-4:<br>W46.1<br>W46.8<br>W46.9<br>W47.1<br>W47.8<br>W47.9<br>W48.1<br>W48.8<br>W48.9 | ZA codes:<br>038565<br>190376<br>190344<br>038570<br>038524<br>038560<br><br>CVV codes:<br>58160<br>581651<br>581521<br>581513<br>581525 | 81.52 | Icd-9:<br>81.52<br>Icd-10:<br>OSR.A009<br>OSR.A00A<br>OSR.A00Z<br>OSR.A019<br>OSR.A01A<br>OSR.A01Z<br>OSR.A039<br>OSR.A03A<br>OSR.A03Z<br>OSR.A07Z<br>OSR.A0J9                                                                                                                                                                                                               |

|                          |                                                                                                                                                                                                                                                                                                                                                                                                                                                                             |                          |                             |                                                                                                                                                                                |                                  |                                                                                                                                                                                                                                                                                                                                                                                                                                                                             |
|--------------------------|-----------------------------------------------------------------------------------------------------------------------------------------------------------------------------------------------------------------------------------------------------------------------------------------------------------------------------------------------------------------------------------------------------------------------------------------------------------------------------|--------------------------|-----------------------------|--------------------------------------------------------------------------------------------------------------------------------------------------------------------------------|----------------------------------|-----------------------------------------------------------------------------------------------------------------------------------------------------------------------------------------------------------------------------------------------------------------------------------------------------------------------------------------------------------------------------------------------------------------------------------------------------------------------------|
|                          | OSR.A0JA<br>OSR.A0JZ<br>OSR.S019<br>OSR.S01A<br>OSR.S01Z<br>OSR.S039<br>OSR.S03A<br>OSR.S03Z<br>OSR.S07Z<br>OSR.S0J9<br>OSR.S0JA<br>OSR.S0JZ<br>OSR.S0KZ<br><br>Right= E, R<br>OSR.E009<br>OSR.E00A<br>OSR.E00Z<br>OSR.E019<br>OSR.E01A<br>OSR.E01Z<br>OSR.E039<br>OSR.E03A<br>OSR.E03Z<br>OSR.E07Z<br>OSR.E0J9<br>OSR.E0JA<br>OSR.E0JZ<br>OSR.E0KZ<br>OSR.R019<br>OSR.R01A<br>OSR.R01Z<br>OSR.R039<br>OSR.R03A<br>OSR.R03Z<br>OSR.R07Z<br>OSR.R0J9<br>OSR.R0JZ<br>OSR.R0KZ |                          |                             | 581522<br>581523<br><br>CBV codes:<br>338567<br>338567H<br>338567W<br>338567L<br>338567R<br>338567D<br>338567E<br>190344<br>190345<br>338567F<br>338567G<br>338567C<br>338567Y |                                  | OSR.A0JA<br>OSR.A0JZ<br>OSR.S019<br>OSR.S01A<br>OSR.S01Z<br>OSR.S039<br>OSR.S03A<br>OSR.S03Z<br>OSR.S07Z<br>OSR.S0J9<br>OSR.S0JA<br>OSR.S0JZ<br>OSR.S0KZ<br><br>Right= E, R<br>OSR.E009<br>OSR.E00A<br>OSR.E00Z<br>OSR.E019<br>OSR.E01A<br>OSR.E01Z<br>OSR.E039<br>OSR.E03A<br>OSR.E03Z<br>OSR.E07Z<br>OSR.E0J9<br>OSR.E0JA<br>OSR.E0JZ<br>OSR.E0KZ<br>OSR.R019<br>OSR.R01A<br>OSR.R01Z<br>OSR.R039<br>OSR.R03A<br>OSR.R03Z<br>OSR.R07Z<br>OSR.R0J9<br>OSR.R0JZ<br>OSR.R0KZ |
| <b>Internal fixation</b> | Icd-9:<br>79.35<br>78.55<br>79.25<br>79.15<br><br>Icd-10:<br>OQS.604Z<br>OQS.704Z                                                                                                                                                                                                                                                                                                                                                                                           | CCI:<br>1.VA.74, 1.VC.74 | OPCS-4:<br>W19.1 P<br>W24.1 | ZA codes:<br>038535<br>038533<br>038534<br>038556<br>038527<br>038532<br>038529<br>038426                                                                                      | 79.35<br>78.55<br>79.25<br>79.15 | Icd-9:<br>79.35<br>78.55<br>79.25<br>79.15<br><br>Icd-10:<br>OQS.604Z<br>OQS.704Z                                                                                                                                                                                                                                                                                                                                                                                           |

|                                                                                                                                                                                                                                                                                                                                                                                                                                                                                                                                                                                                    |  |  |                                                                                                                                                                                                                                                                                                                                                                                                                                                                                                                                |                                                                                                                                                                                                                                                                                                                                                                                                                                                                                                                                                                                                    |
|----------------------------------------------------------------------------------------------------------------------------------------------------------------------------------------------------------------------------------------------------------------------------------------------------------------------------------------------------------------------------------------------------------------------------------------------------------------------------------------------------------------------------------------------------------------------------------------------------|--|--|--------------------------------------------------------------------------------------------------------------------------------------------------------------------------------------------------------------------------------------------------------------------------------------------------------------------------------------------------------------------------------------------------------------------------------------------------------------------------------------------------------------------------------|----------------------------------------------------------------------------------------------------------------------------------------------------------------------------------------------------------------------------------------------------------------------------------------------------------------------------------------------------------------------------------------------------------------------------------------------------------------------------------------------------------------------------------------------------------------------------------------------------|
| 0QS.804Z<br>0QS.904Z<br>0QS.B04Z<br>0QS.C04Z<br>0QH.604Z<br>0QH.634Z<br>0QH.644Z<br>0QH.704Z<br>0QH.734Z<br>0QH.744Z<br>0QH.804Z<br>0QH.834Z<br>0QH.844Z<br>0QH.904Z<br>0QH.934Z<br>0QH.944Z<br>0QH.B04Z<br>0QH.B34Z<br>0QH.B44Z<br>0QH.C04Z<br>0QH.C34Z<br>0QH.C44Z<br>0QS.60ZZ<br>0QS.70ZZ<br>0QS.80ZZ<br>0QS.90ZZ<br>0QS.B0ZZ<br>0QS.C0ZZ<br>0QS706Z<br>0QS606Z<br>0QH706Z<br>0QH606Z<br>0QS906Z<br>0QS806Z<br>0QS806Z<br>0QSB06Z<br>0SSB04Z<br>0SS904Z<br>0QSC06Z<br>0QH906Z<br>0QH806Z<br>0QHB06Z<br>0QHC06Z<br>0SHB04Z<br>0SHB04Z<br>0SH904Z<br>0QS.634Z<br>0QS.644Z<br>0QS.734Z<br>0QS.744Z |  |  | 038525<br><br>CVV codes:<br>579013<br>579096<br>579267<br>579056<br>579266<br>579260<br>579269<br>579264<br>579223<br>579216<br>579263<br>579268<br>579262<br>579006<br>579261<br>579296<br>82043<br>578706<br>579024<br>579086<br>579265<br>82049<br>578726<br><br>CBV codes:<br>338534R<br>338534E<br>338536X<br>338533Y<br>338533Q<br>338534S<br>338533<br>338534P<br>338536<br>338533X<br>338534G<br>338534Q<br>338539L<br>338533W<br>338534N<br>338533R<br>338536F<br>338534R<br>338533G<br>338533H<br>338536E<br>338533C | 0QS.804Z<br>0QS.904Z<br>0QS.B04Z<br>0QS.C04Z<br>0QH.604Z<br>0QH.634Z<br>0QH.644Z<br>0QH.704Z<br>0QH.734Z<br>0QH.744Z<br>0QH.804Z<br>0QH.834Z<br>0QH.844Z<br>0QH.904Z<br>0QH.934Z<br>0QH.944Z<br>0QH.B04Z<br>0QH.B34Z<br>0QH.B44Z<br>0QH.C04Z<br>0QH.C34Z<br>0QH.C44Z<br>0QS.60ZZ<br>0QS.70ZZ<br>0QS.80ZZ<br>0QS.90ZZ<br>0QS.B0ZZ<br>0QS.C0ZZ<br>0QS706Z<br>0QS606Z<br>0QH706Z<br>0QH606Z<br>0QS906Z<br>0QS806Z<br>0QS806Z<br>0QSB06Z<br>0SSB04Z<br>0SS904Z<br>0QSC06Z<br>0QH906Z<br>0QH806Z<br>0QHB06Z<br>0QHC06Z<br>0SHB04Z<br>0SHB04Z<br>0SH904Z<br>0QS.634Z<br>0QS.644Z<br>0QS.734Z<br>0QS.744Z |
|----------------------------------------------------------------------------------------------------------------------------------------------------------------------------------------------------------------------------------------------------------------------------------------------------------------------------------------------------------------------------------------------------------------------------------------------------------------------------------------------------------------------------------------------------------------------------------------------------|--|--|--------------------------------------------------------------------------------------------------------------------------------------------------------------------------------------------------------------------------------------------------------------------------------------------------------------------------------------------------------------------------------------------------------------------------------------------------------------------------------------------------------------------------------|----------------------------------------------------------------------------------------------------------------------------------------------------------------------------------------------------------------------------------------------------------------------------------------------------------------------------------------------------------------------------------------------------------------------------------------------------------------------------------------------------------------------------------------------------------------------------------------------------|

|                                                                                                                                                                                                                                                                                                                                                                      |  |  |  |                                                                                                                                                                                                                                                                                                                                                                             |  |                                                                                                                                                                                                                                                                                                                                                                      |
|----------------------------------------------------------------------------------------------------------------------------------------------------------------------------------------------------------------------------------------------------------------------------------------------------------------------------------------------------------------------|--|--|--|-----------------------------------------------------------------------------------------------------------------------------------------------------------------------------------------------------------------------------------------------------------------------------------------------------------------------------------------------------------------------------|--|----------------------------------------------------------------------------------------------------------------------------------------------------------------------------------------------------------------------------------------------------------------------------------------------------------------------------------------------------------------------|
| 0QS.834Z<br>0QS.844Z<br>0QS.934Z<br>0QS.944Z<br>0QS.B34Z<br>0QS.B44Z<br>0QS.C34Z<br>0QS.C44Z<br>0QS736Z<br>0QS636Z<br>0SRR0JA<br>0QH736Z<br>0QH636Z<br>0QS6XZZ<br>0QS7XZZ<br>0QSB36Z<br>0QS646Z<br>0QS836Z<br>0QS936Z<br>0QS746Z<br>0SSB34Z<br>0SS934Z<br>0QSC36Z<br>0QH936Z<br>0QH836Z<br>0QHB36Z<br>0QS635Z<br>0QS735Z<br>0QHC36Z<br>0SHB34Z<br>0QH746Z<br>0SH934Z |  |  |  | 338534J<br>338536B<br>338533D<br>38556<br>338534<br>338535N<br>338539K<br>338535R<br>338536R<br>338535S<br>038532<br>338534S<br>338534T<br>038512<br>338536J<br>338533U<br>338536N<br>338534L<br>338533M<br>338534I<br>338537J<br>338538E<br>338538F<br>338538N<br>038525<br>338527<br>338533B<br>338533F<br>338533T<br>338534K<br>338534M<br>338536W<br>338537Y<br>338539H |  | 0QS.834Z<br>0QS.844Z<br>0QS.934Z<br>0QS.944Z<br>0QS.B34Z<br>0QS.B44Z<br>0QS.C34Z<br>0QS.C44Z<br>0QS736Z<br>0QS636Z<br>0SRR0JA<br>0QH736Z<br>0QH636Z<br>0QS6XZZ<br>0QS7XZZ<br>0QSB36Z<br>0QS646Z<br>0QS836Z<br>0QS936Z<br>0QS746Z<br>0SSB34Z<br>0SS934Z<br>0QSC36Z<br>0QH936Z<br>0QH836Z<br>0QHB36Z<br>0QS635Z<br>0QS735Z<br>0QHC36Z<br>0SHB34Z<br>0QH746Z<br>0SH934Z |
|----------------------------------------------------------------------------------------------------------------------------------------------------------------------------------------------------------------------------------------------------------------------------------------------------------------------------------------------------------------------|--|--|--|-----------------------------------------------------------------------------------------------------------------------------------------------------------------------------------------------------------------------------------------------------------------------------------------------------------------------------------------------------------------------------|--|----------------------------------------------------------------------------------------------------------------------------------------------------------------------------------------------------------------------------------------------------------------------------------------------------------------------------------------------------------------------|

### Supplementary S3: Cohorts generation steps

| Country                                                                                                                                              | US*       | Canada  | England** | Netherlands | Israel | Taiwan  |
|------------------------------------------------------------------------------------------------------------------------------------------------------|-----------|---------|-----------|-------------|--------|---------|
| <b>Initial Cohort</b>                                                                                                                                | 2,054,254 | 101,483 | 104,327   | 118,120     | 29,389 | 185,421 |
| <b>Step 1:</b> Exclude if not first hip fracture admission in the past 180 days (look back 180 days from the index date to the prior DISCHARGE date) | 104,613   | 1,584   | 14,281    | 2,570       | 152    | 6,369   |
| <b>Step 2:</b> Delete patients with missing age or sex                                                                                               | 114       | 52      | 0         | 0           | 0      | 743     |
| <b>Step 3:</b> Delete Age<66                                                                                                                         | 124,603   | 11,416  | 8,495     | 16,558      | 3,908  | 34,080  |
| <b>Step 4:</b> Delete Episodes Associated with Trauma***                                                                                             | 7,094     | 4,834   | 5,355     | 12,867      | 1,152  | 10,488  |
| <b>Step 5:</b> Resides out of area                                                                                                                   | 8,973     | 91      | 0         | 72          | 6      | 0       |
| <b>Step 6:</b> Exclude if without 12-month continuous enrolment (pre-index)                                                                          | 47,623    | 435     | 2,087     | 0           | 204    | 0       |
| <b>Step 7:</b> Exclude if without 12-month continuous enrolment unless died within one year (post index)                                             | 633       | 104     | 4,758     | 0           | 26     | 0       |
| <b>Step 8:</b> Exclude if 2+ months consecutive MA within 12 months prior to the index admission                                                     | 509,910   | NA      | NA        | NA          | NA     | NA      |
| <b>Step 9:</b> Exclude if 2+ months consecutive MA within 12 months post-index admission                                                             | 30,995    | NA      | NA        | NA          | NA     | NA      |
| <b>Final cohort</b>                                                                                                                                  | 1,219,696 | 82,967  | 69,351    | 86,053      | 23,941 | 133,741 |

\* Because complete data on in-hospital and out-of-hospital treatments was lacking for patients enrolled in Medicare Advantage (MA) plans, we excluded them from the analysis.

\*\* N= 81,026 patients in England excluded because hip fractures occurred outside of the patient's follow-up time in CPRD

\*\*\*The following ICD-10 codes or equivalent were used to exclude hip fractures associated with trauma: E800-E848, E881-884, E908-909, E916-928\*\*\*

### Supplementary S4: Number of hip fracture hospitalizations by country and year

|                     | 2011    | 2012    | 2013    | 2014    | 2015    | 2016    | 2017    | 2018    | Total     |
|---------------------|---------|---------|---------|---------|---------|---------|---------|---------|-----------|
| <b>US</b>           | 161,626 | 152,083 | 152,159 | 157,026 | 155,066 | 150,695 | 147,712 | 143,329 | 1,219,696 |
| <b>Canada</b>       | 9,495   | 10,021  | 10,410  | 10,574  | 10,411  | 10,408  | 10,642  | 11,006  | 82,967    |
| <b>England</b>      | 9,603   | 9,347   | 9,456   | 8,996   | 8,707   | 7,891   | 7,820   | 7,531   | 69,351    |
| <b>Netherlands*</b> | NA      | NA      | 12,945  | 14,004  | 14,446  | 14,654  | 14,834  | 15,170  | 86,053    |
| <b>Israel</b>       | 2,628   | 2,624   | 3,130   | 2,977   | 2,931   | 3,220   | 3,133   | 3,298   | 23,941    |
| <b>Taiwan</b>       | 15,792  | 15,910  | 16,181  | 16,457  | 16,498  | 17,519  | 17,467  | 17,917  | 133,741   |

\*Data for 2011 and 2012 was not available from the Netherlands

**Appendix 5: Age- and sex-standardized incidence of hospital admissions for hip fracture by country and year, admissions per 1000 per year<sup>1</sup>**

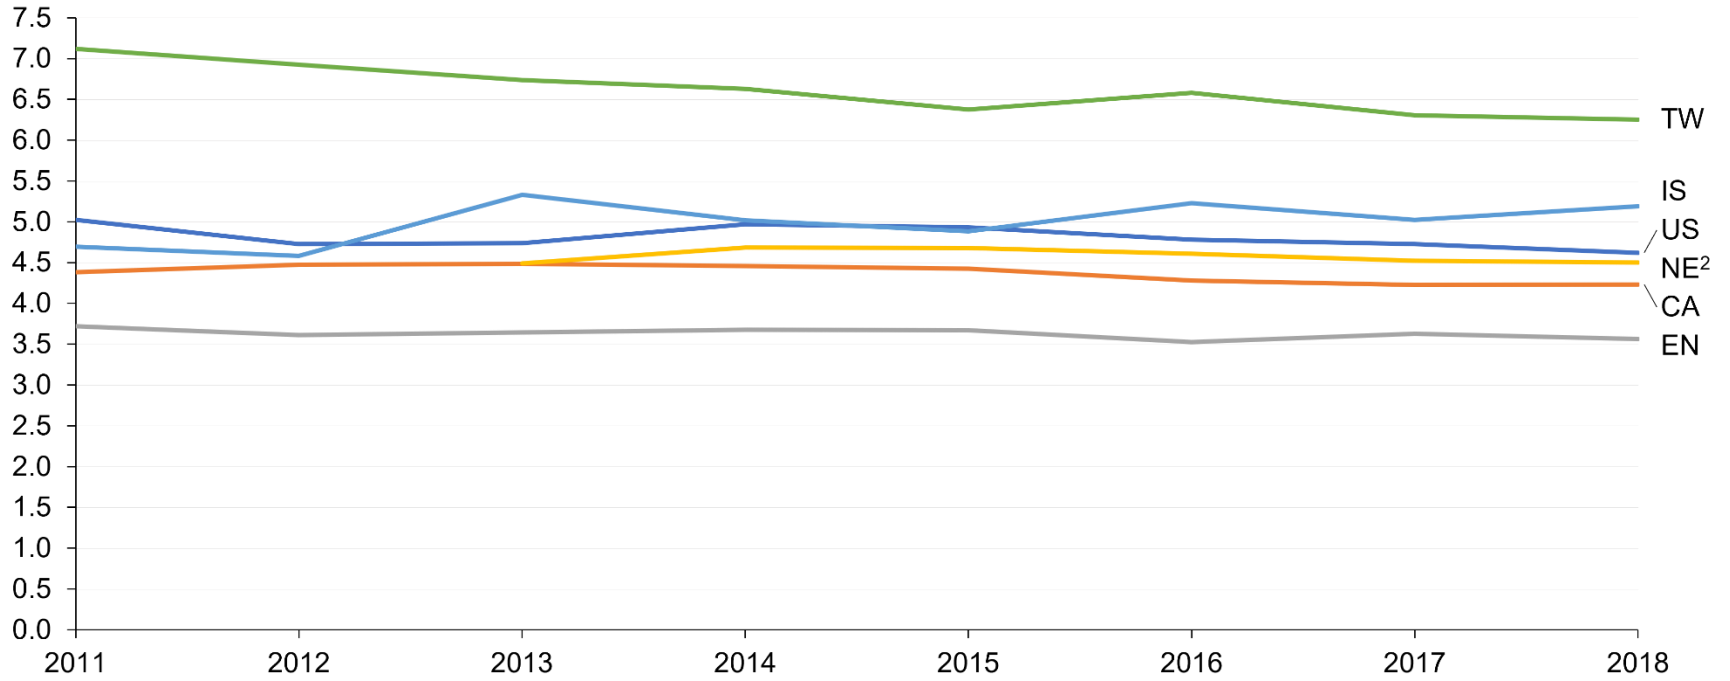

1. US = United States; CA = Canada; EN = England; NE = Netherlands; IS = Israel; TW = Taiwan  
 2. Data unavailable for 2011-12

**Supplementary S6: Age and sex standardized mortality and readmissions after hospitalization for hip fracture by country, 2011-2018**

| Country      | Metric                     | All   |       |       |       |       |       |       |       |
|--------------|----------------------------|-------|-------|-------|-------|-------|-------|-------|-------|
|              |                            | 2011  | 2012  | 2013  | 2014  | 2015  | 2016  | 2017  | 2018  |
| US           | Death within 30 days       | 0.079 | 0.081 | 0.080 | 0.078 | 0.078 | 0.077 | 0.078 | 0.072 |
|              | Death within one year      | 0.275 | 0.279 | 0.260 | 0.274 | 0.269 | 0.276 | 0.276 | 0.262 |
|              | Readmission within 30 days | 0.136 | 0.130 | 0.121 | 0.120 | 0.120 | 0.118 | 0.118 | 0.116 |
| Canada       | Death within 30 days       | 0.085 | 0.085 | 0.077 | 0.079 | 0.075 | 0.071 | 0.077 | 0.077 |
|              | Death within one year      | 0.258 | 0.258 | 0.242 | 0.244 | 0.241 | 0.233 | 0.245 | 0.244 |
|              | Readmission within 30 days | 0.090 | 0.083 | 0.081 | 0.082 | 0.081 | 0.078 | 0.083 | 0.078 |
| England      | Death within 30 days       | 0.058 | 0.065 | 0.069 | 0.064 | 0.061 | 0.067 | 0.062 | 0.060 |
|              | Death within one year      | 0.185 | 0.195 | 0.195 | 0.199 | 0.189 | 0.200 | 0.202 | 0.194 |
|              | Readmission within 30 days | 0.160 | 0.161 | 0.166 | 0.173 | 0.169 | 0.165 | 0.183 | 0.176 |
| Netherlands* | Death within 30 days       | NA    | NA    | 0.095 | 0.096 | 0.102 | 0.101 | 0.100 | 0.103 |
|              | Death within one year      | NA    | NA    | 0.279 | 0.288 | 0.288 | 0.289 | 0.280 | 0.275 |
|              | Readmission within 30 days | NA    | NA    | 0.108 | 0.096 | 0.091 | 0.091 | 0.087 | 0.080 |
| Israel       | Death within 30 days       | 0.042 | 0.053 | 0.047 | 0.048 | 0.058 | 0.040 | 0.043 | 0.053 |
|              | Death within one year      | 0.228 | 0.231 | 0.220 | 0.232 | 0.219 | 0.198 | 0.188 | 0.213 |
|              | Readmission within 30 days | 0.163 | 0.166 | 0.159 | 0.165 | 0.147 | 0.142 | 0.145 | 0.169 |
| Taiwan       | Death within 30 days       | 0.028 | 0.031 | 0.030 | 0.029 | 0.030 | 0.028 | 0.030 | 0.030 |
|              | Death within one year      | 0.161 | 0.164 | 0.166 | 0.158 | 0.164 | 0.166 | 0.170 | 0.157 |
|              | Readmission within 30 days | 0.137 | 0.140 | 0.135 | 0.134 | 0.134 | 0.137 | 0.139 | 0.127 |

\* Data unavailable in 2011 and 2012



**Supplementary S7: Age and sex standardized percentages of patients receiving THA, HA, and IF\* for patients hospitalized with hip fracture, 2011-2018**

|               | Metric    | All   |       |       |       |       |       |       |       |
|---------------|-----------|-------|-------|-------|-------|-------|-------|-------|-------|
|               |           | 2011  | 2012  | 2013  | 2014  | 2015  | 2016  | 2017  | 2018  |
| US            | THA       | 0.033 | 0.035 | 0.037 | 0.041 | 0.042 | 0.048 | 0.049 | 0.052 |
|               | HA        | 0.331 | 0.329 | 0.323 | 0.323 | 0.312 | 0.279 | 0.273 | 0.267 |
|               | IF        | 0.577 | 0.578 | 0.580 | 0.577 | 0.581 | 0.599 | 0.603 | 0.604 |
|               | No-repair | 0.058 | 0.058 | 0.060 | 0.059 | 0.066 | 0.074 | 0.076 | 0.077 |
| Canada        | THA       | 0.101 | 0.092 | 0.093 | 0.101 | 0.101 | 0.101 | 0.097 | 0.061 |
|               | HA        | 0.285 | 0.297 | 0.282 | 0.294 | 0.279 | 0.280 | 0.284 | 0.325 |
|               | IF        | 0.559 | 0.559 | 0.570 | 0.548 | 0.557 | 0.551 | 0.549 | 0.546 |
|               | No-repair | 0.056 | 0.052 | 0.055 | 0.057 | 0.062 | 0.068 | 0.070 | 0.068 |
| England       | THA       | 0.042 | 0.062 | 0.066 | 0.067 | 0.068 | 0.081 | 0.085 | 0.094 |
|               | HA        | 0.406 | 0.388 | 0.388 | 0.394 | 0.401 | 0.398 | 0.388 | 0.391 |
|               | IF        | 0.440 | 0.444 | 0.448 | 0.439 | 0.436 | 0.432 | 0.430 | 0.422 |
|               | No-repair | 0.116 | 0.109 | 0.101 | 0.103 | 0.098 | 0.093 | 0.099 | 0.097 |
| Netherlands** | THA       | NA    | NA    | 0.039 | 0.037 | 0.042 | 0.045 | 0.044 | 0.044 |
|               | HA        | NA    | NA    | 0.376 | 0.354 | 0.361 | 0.363 | 0.361 | 0.361 |
|               | IF        | NA    | NA    | 0.521 | 0.519 | 0.507 | 0.517 | 0.520 | 0.514 |
|               | No-repair | NA    | NA    | 0.064 | 0.089 | 0.090 | 0.075 | 0.075 | 0.081 |
| Israel        | THA       | 0.028 | 0.027 | 0.029 | 0.035 | 0.048 | 0.05  | 0.071 | 0.091 |
|               | HA        | 0.248 | 0.264 | 0.252 | 0.241 | 0.248 | 0.281 | 0.241 | 0.228 |
|               | IF        | 0.589 | 0.595 | 0.626 | 0.63  | 0.621 | 0.597 | 0.632 | 0.619 |
|               | No-repair | 0.135 | 0.114 | 0.093 | 0.094 | 0.083 | 0.073 | 0.055 | 0.061 |
| Taiwan        | THA       | 0.002 | 0.002 | 0.001 | 0.001 | 0.002 | 0.010 | 0.008 | 0.007 |
|               | HA        | 0.367 | 0.374 | 0.377 | 0.383 | 0.381 | 0.367 | 0.380 | 0.388 |
|               | IF        | 0.576 | 0.574 | 0.575 | 0.574 | 0.579 | 0.576 | 0.566 | 0.560 |
|               | No-repair | 0.054 | 0.049 | 0.048 | 0.042 | 0.038 | 0.048 | 0.046 | 0.046 |

\* THA = Total hip arthroplasty, HA = Hemiarthroplasty, IF = Internal fixation \*\* Data unavailable in 2011 and 2012

**Supplementary S8: Age and sex standardized percentages of patients receiving THA, HA, and IF\* for patients hospitalized with hip fracture for all years, by country.**

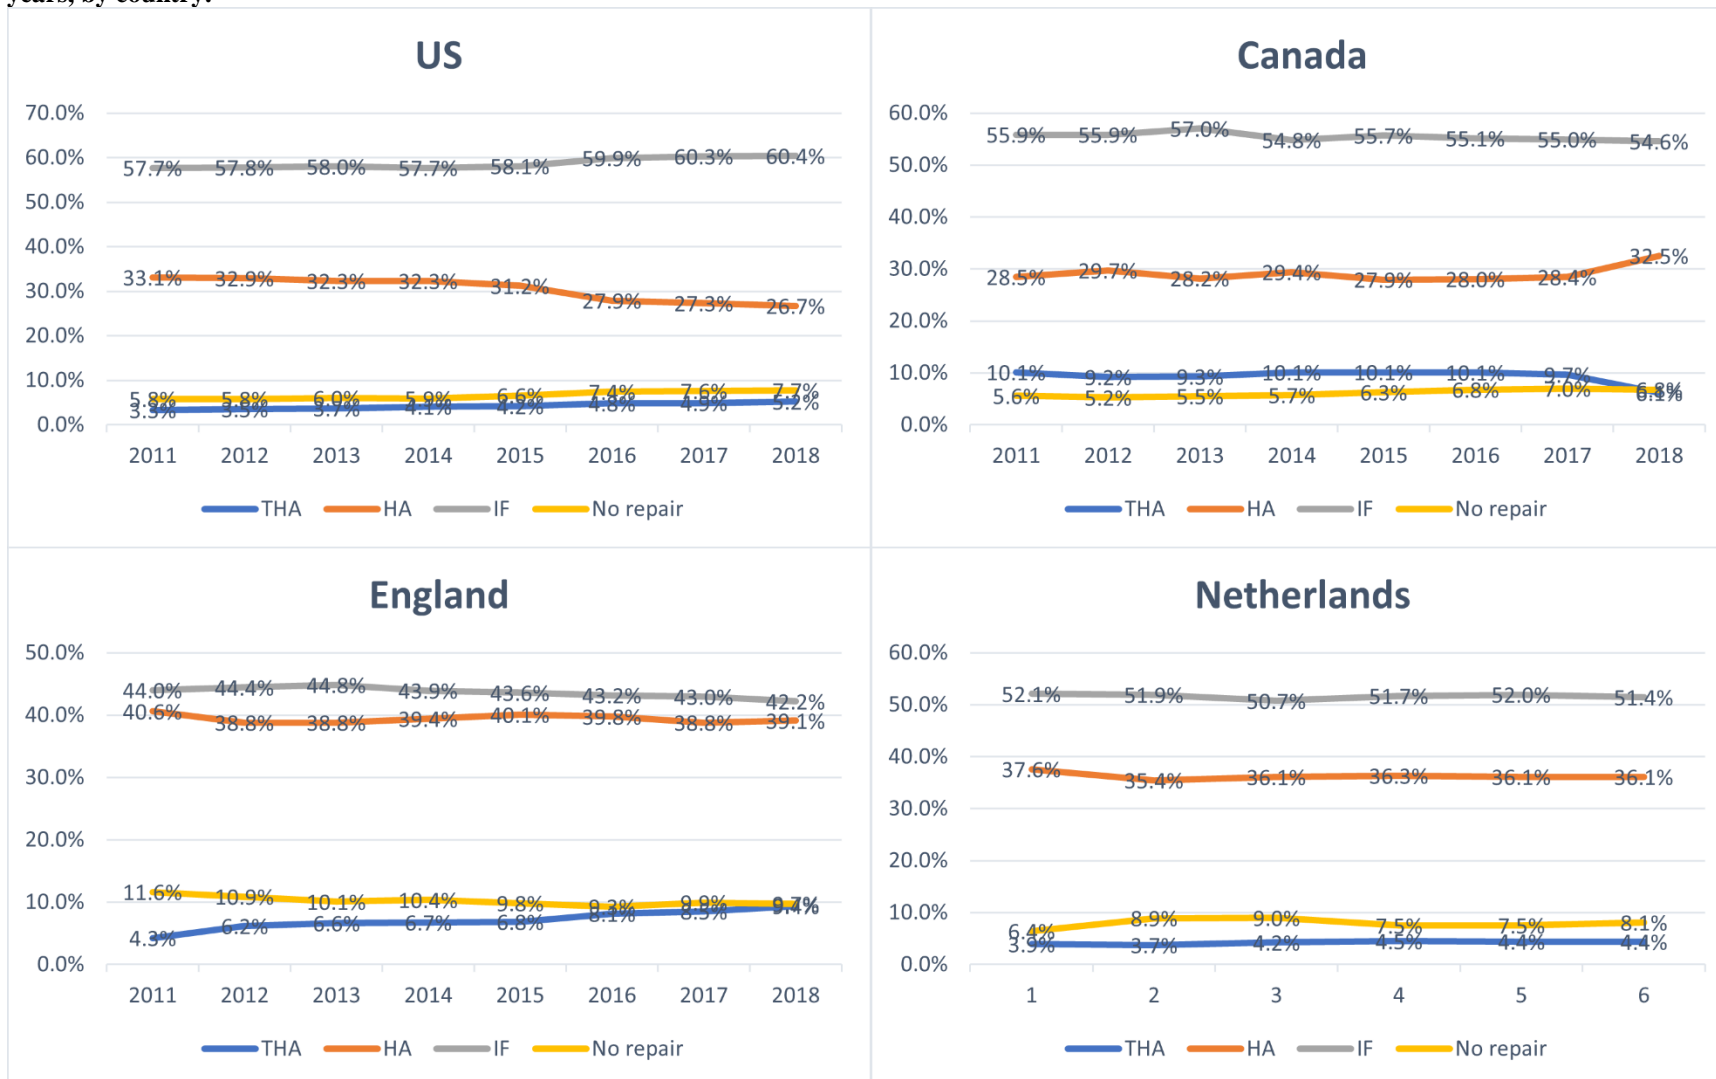

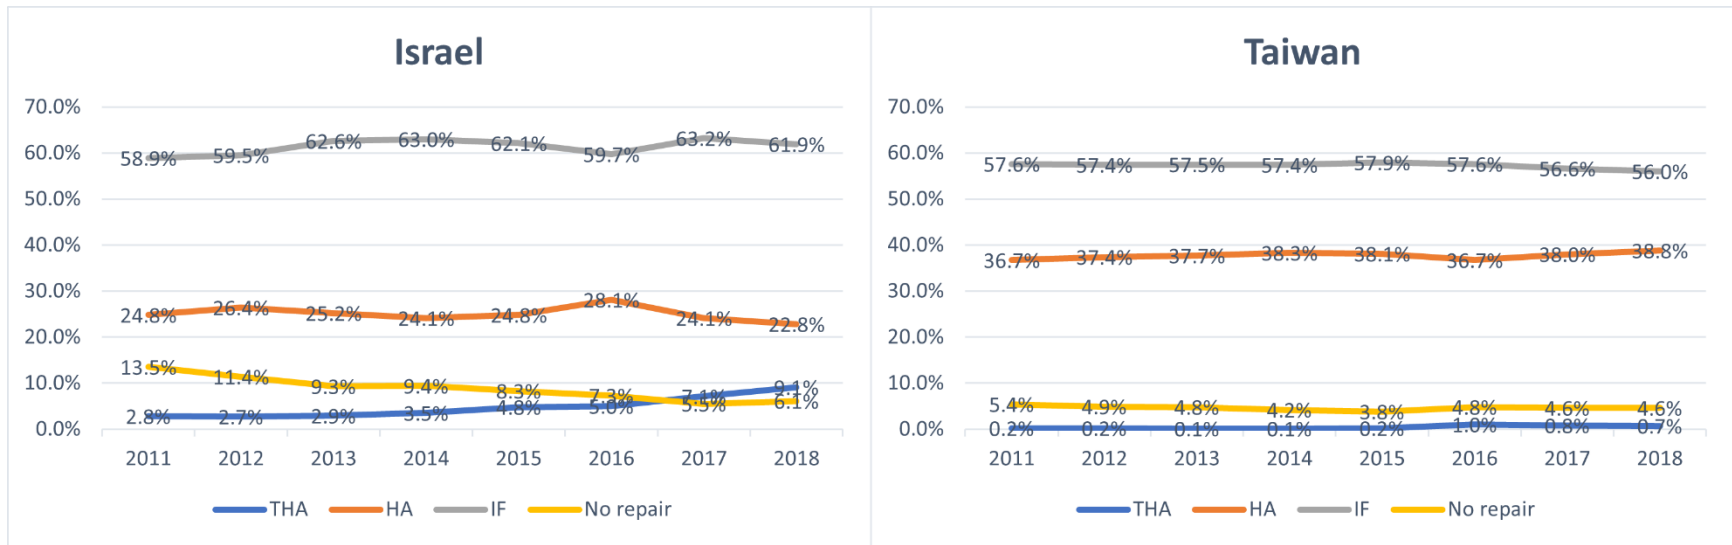

\*THA = Total hip arthroplasty, HA = Hemiarthroplasty, IF = Internal fixation

**Supplementary S9: Stratified Age and sex standardized percentages of patients receiving THA, HA, and IF\* for patients hospitalized with hip fracture, 2011-2018**

|                   | Metric    | <90   |       |       |       |       |       |       |       | 90+   |       |       |       |       |       |       |       |
|-------------------|-----------|-------|-------|-------|-------|-------|-------|-------|-------|-------|-------|-------|-------|-------|-------|-------|-------|
|                   |           | 2011  | 2012  | 2013  | 2014  | 2015  | 2016  | 2017  | 2018  | 2011  | 2012  | 2013  | 2014  | 2015  | 2016  | 2017  | 2018  |
| US                | THA       | 0.037 | 0.039 | 0.042 | 0.047 | 0.049 | 0.057 | 0.059 | 0.063 | 0.017 | 0.018 | 0.016 | 0.017 | 0.018 | 0.023 | 0.021 | 0.021 |
|                   | HA        | 0.337 | 0.333 | 0.327 | 0.325 | 0.313 | 0.278 | 0.270 | 0.264 | 0.316 | 0.317 | 0.313 | 0.318 | 0.308 | 0.277 | 0.276 | 0.27  |
|                   | IF        | 0.570 | 0.573 | 0.573 | 0.571 | 0.576 | 0.592 | 0.597 | 0.597 | 0.593 | 0.588 | 0.591 | 0.588 | 0.589 | 0.608 | 0.611 | 0.614 |
|                   | No-repair | 0.024 | 0.023 | 0.025 | 0.023 | 0.026 | 0.031 | 0.030 | 0.030 | 0.074 | 0.077 | 0.079 | 0.077 | 0.085 | 0.092 | 0.093 | 0.095 |
| Canada            | THA       | 0.109 | 0.097 | 0.100 | 0.109 | 0.111 | 0.107 | 0.102 | 0.069 | 0.069 | 0.072 | 0.069 | 0.077 | 0.072 | 0.077 | 0.079 | 0.039 |
|                   | HA        | 0.286 | 0.299 | 0.284 | 0.298 | 0.278 | 0.284 | 0.285 | 0.332 | 0.281 | 0.288 | 0.279 | 0.284 | 0.284 | 0.271 | 0.283 | 0.306 |
|                   | IF        | 0.553 | 0.555 | 0.566 | 0.540 | 0.552 | 0.543 | 0.547 | 0.535 | 0.580 | 0.576 | 0.582 | 0.568 | 0.571 | 0.577 | 0.556 | 0.576 |
|                   | No-repair | 0.052 | 0.049 | 0.050 | 0.052 | 0.059 | 0.066 | 0.065 | 0.064 | 0.070 | 0.064 | 0.070 | 0.071 | 0.074 | 0.075 | 0.082 | 0.079 |
| England           | THA       | 0.048 | 0.070 | 0.077 | 0.079 | 0.082 | 0.100 | 0.105 | 0.118 | 0.008 | 0.010 | 0.012 | 0.010 | 0.008 | 0.011 | 0.011 | 0.012 |
|                   | HA        | 0.415 | 0.388 | 0.392 | 0.399 | 0.401 | 0.396 | 0.381 | 0.392 | 0.392 | 0.410 | 0.403 | 0.405 | 0.418 | 0.420 | 0.424 | 0.399 |
|                   | IF        | 0.427 | 0.437 | 0.438 | 0.426 | 0.426 | 0.415 | 0.420 | 0.402 | 0.484 | 0.472 | 0.478 | 0.476 | 0.465 | 0.479 | 0.457 | 0.481 |
|                   | No-repair | 0.114 | 0.108 | 0.096 | 0.101 | 0.094 | 0.092 | 0.096 | 0.092 | 0.120 | 0.110 | 0.110 | 0.112 | 0.112 | 0.093 | 0.110 | 0.112 |
| Netherlands<br>** | THA       | NA    | NA    | 0.045 | 0.045 | 0.052 | 0.058 | 0.057 | 0.060 | NA    | NA    | 0.011 | 0.006 | 0.009 | 0.006 | 0.006 | 0.000 |
|                   | HA        | NA    | NA    | 0.381 | 0.358 | 0.361 | 0.366 | 0.360 | 0.357 | NA    | NA    | 0.367 | 0.353 | 0.356 | 0.348 | 0.361 | 0.359 |
|                   | IF        | NA    | NA    | 0.506 | 0.511 | 0.501 | 0.509 | 0.513 | 0.512 | NA    | NA    | 0.573 | 0.546 | 0.533 | 0.549 | 0.544 | 0.530 |
|                   | No-repair | NA    | NA    | 0.068 | 0.086 | 0.086 | 0.068 | 0.069 | 0.071 | NA    | NA    | 0.049 | 0.095 | 0.102 | 0.097 | 0.090 | 0.111 |
| Israel            | THA       | 0.034 | 0.031 | 0.036 | 0.040 | 0.058 | 0.059 | 0.084 | 0.112 | 0.003 | 0.014 | 0.004 | 0.012 | 0.019 | 0.018 | 0.029 | 0.032 |
|                   | HA        | 0.248 | 0.269 | 0.253 | 0.239 | 0.247 | 0.267 | 0.240 | 0.220 | 0.240 | 0.258 | 0.244 | 0.249 | 0.254 | 0.331 | 0.242 | 0.244 |
|                   | IF        | 0.585 | 0.586 | 0.620 | 0.631 | 0.619 | 0.603 | 0.622 | 0.618 | 0.623 | 0.620 | 0.644 | 0.624 | 0.622 | 0.572 | 0.667 | 0.625 |
|                   | No-repair | 0.132 | 0.114 | 0.090 | 0.090 | 0.077 | 0.072 | 0.054 | 0.050 | 0.134 | 0.108 | 0.107 | 0.115 | 0.105 | 0.078 | 0.062 | 0.099 |
| Taiwan            | THA       | 0.003 | 0.003 | 0.001 | 0.002 | 0.002 | 0.011 | 0.008 | 0.008 | 0.002 | 0.001 | 0.000 | 0.000 | 0.001 | 0.009 | 0.006 | 0.005 |
|                   | HA        | 0.387 | 0.389 | 0.397 | 0.400 | 0.400 | 0.386 | 0.399 | 0.406 | 0.314 | 0.339 | 0.326 | 0.344 | 0.325 | 0.314 | 0.329 | 0.336 |
|                   | IF        | 0.565 | 0.565 | 0.560 | 0.564 | 0.565 | 0.559 | 0.551 | 0.546 | 0.607 | 0.587 | 0.604 | 0.588 | 0.618 | 0.617 | 0.602 | 0.593 |
|                   | No-repair | 0.046 | 0.043 | 0.042 | 0.034 | 0.033 | 0.044 | 0.042 | 0.040 | 0.076 | 0.073 | 0.069 | 0.068 | 0.056 | 0.060 | 0.062 | 0.066 |

\*THA = Total hip arthroplasty, HA = Hemiarthroplasty, IF = Internal fixation \*\* Data unavailable in 2011 and 2012

**Supplementary S10: Stratified Age and sex standardized mortality for hip fracture by country, 2011-2018**

| Country          | Metric                     | <90   |       |       |       |       |       |       |       | 90+   |       |       |       |       |       |       |       |
|------------------|----------------------------|-------|-------|-------|-------|-------|-------|-------|-------|-------|-------|-------|-------|-------|-------|-------|-------|
|                  |                            | 2011  | 2012  | 2013  | 2014  | 2015  | 2016  | 2017  | 2018  | 2011  | 2012  | 2013  | 2014  | 2015  | 2016  | 2017  | 2018  |
| US               | Death within 30 days       | 0.063 | 0.066 | 0.066 | 0.061 | 0.061 | 0.059 | 0.060 | 0.054 | 0.130 | 0.131 | 0.129 | 0.129 | 0.129 | 0.130 | 0.128 | 0.123 |
|                  | Death within one year      | 0.240 | 0.244 | 0.228 | 0.234 | 0.230 | 0.231 | 0.230 | 0.215 | 0.398 | 0.400 | 0.372 | 0.396 | 0.389 | 0.407 | 0.404 | 0.390 |
|                  | Readmission within 30 days | 0.134 | 0.129 | 0.119 | 0.119 | 0.118 | 0.116 | 0.116 | 0.113 | 0.144 | 0.135 | 0.129 | 0.126 | 0.128 | 0.123 | 0.122 | 0.124 |
| Canada           | Death within 30 days       | 0.067 | 0.067 | 0.063 | 0.059 | 0.057 | 0.055 | 0.056 | 0.058 | 0.148 | 0.148 | 0.126 | 0.143 | 0.131 | 0.125 | 0.139 | 0.133 |
|                  | Death within one year      | 0.218 | 0.221 | 0.206 | 0.201 | 0.199 | 0.197 | 0.200 | 0.200 | 0.401 | 0.384 | 0.365 | 0.380 | 0.365 | 0.354 | 0.380 | 0.372 |
|                  | Readmission within 30 days | NA    |
| England          | Death within 30 days       | 0.049 | 0.053 | 0.056 | 0.050 | 0.049 | 0.055 | 0.052 | 0.047 | 0.090 | 0.109 | 0.110 | 0.109 | 0.100 | 0.104 | 0.097 | 0.097 |
|                  | Death within one year      | 0.167 | 0.169 | 0.172 | 0.170 | 0.165 | 0.173 | 0.176 | 0.164 | 0.257 | 0.290 | 0.275 | 0.295 | 0.270 | 0.288 | 0.288 | 0.284 |
|                  | Readmission within 30 days | 0.159 | 0.157 | 0.161 | 0.169 | 0.168 | 0.169 | 0.179 | 0.173 | 0.166 | 0.178 | 0.179 | 0.184 | 0.174 | 0.158 | 0.194 | 0.188 |
| Netherlands<br>* | Death within 30 days       | NA    | NA    | 0.072 | 0.073 | 0.076 | 0.075 | 0.072 | 0.075 | NA    | NA    | 0.174 | 0.163 | 0.177 | 0.175 | 0.178 | 0.181 |
|                  | Death within one year      | NA    | NA    | 0.229 | 0.231 | 0.234 | 0.232 | 0.220 | 0.215 | NA    | NA    | 0.437 | 0.459 | 0.447 | 0.453 | 0.451 | 0.442 |
|                  | Readmission within 30 days | NA    | NA    | 0.113 | 0.098 | 0.092 | 0.092 | 0.089 | 0.081 | NA    | NA    | 0.082 | 0.083 | 0.084 | 0.086 | 0.074 | 0.068 |
| Israel           | Death within 30 days       | 0.034 | 0.045 | 0.038 | 0.035 | 0.049 | 0.034 | 0.034 | 0.042 | 0.072 | 0.083 | 0.085 | 0.093 | 0.085 | 0.056 | 0.070 | 0.090 |
|                  | Death within one year      | 0.197 | 0.201 | 0.185 | 0.202 | 0.193 | 0.175 | 0.157 | 0.176 | 0.347 | 0.327 | 0.336 | 0.330 | 0.305 | 0.268 | 0.283 | 0.328 |
|                  | Readmission within 30 days | NA    |
| Taiwan           | Death within 30 days       | 0.023 | 0.021 | 0.022 | 0.023 | 0.023 | 0.020 | 0.024 | 0.022 | 0.046 | 0.064 | 0.055 | 0.050 | 0.052 | 0.056 | 0.048 | 0.057 |
|                  | Death within one year      | 0.128 | 0.132 | 0.135 | 0.130 | 0.136 | 0.137 | 0.141 | 0.130 | 0.257 | 0.255 | 0.261 | 0.246 | 0.250 | 0.261 | 0.253 | 0.231 |
|                  | Readmission within 30 days | 0.126 | 0.126 | 0.125 | 0.123 | 0.123 | 0.128 | 0.129 | 0.119 | 0.165 | 0.179 | 0.165 | 0.164 | 0.166 | 0.169 | 0.167 | 0.148 |

\* Data unavailable in 2011 and 2012

**Supplementary S11: Age and sex standardized percentages of patients receiving THA, HA, and IF for patients hospitalized with hip fracture, 2011-2018 (Netherlands before upscaling)**

| Full cohort |                 | 2013  | 2014  | 2015  | 2016  | 2017  | 2018  |
|-------------|-----------------|-------|-------|-------|-------|-------|-------|
| Netherlands | THA             | 0.027 | 0.035 | 0.040 | 0.044 | 0.043 | 0.044 |
|             | HA              | 0.261 | 0.334 | 0.343 | 0.355 | 0.356 | 0.360 |
|             | IF              | 0.361 | 0.489 | 0.483 | 0.506 | 0.511 | 0.513 |
|             | No-repair       | 0.045 | 0.084 | 0.085 | 0.073 | 0.074 | 0.081 |
|             | No registration | 0.306 | 0.058 | 0.049 | 0.022 | 0.016 | 0.002 |

\*THA = Total hip arthroplasty, HA = Hemiarthroplasty, IF = Internal fixation
